# Supplementary material for: Lactoferrin and lactoferricin endocytosis halt Giardia cell growth and prevent infective cyst production
Source: PubMed Central journal article supplement (PMC6303297; doi:10.1038/s41598-018-36563-1), 2018-12-21

**Lactoferrin and lactoferricin endocytosis halt *Giardia* cell growth and prevent infective cyst production**

Lorena S. Frontera<sup>1</sup>, Sofía Moyano<sup>1</sup>, Gonzalo Quassollo<sup>1</sup>, Adriana Lanfredi-Rangel<sup>2</sup>, Andrea S. Rópolo<sup>1</sup>, and María C. Touz<sup>1\*</sup>

<sup>1</sup>Instituto de Investigación Médica Mercedes y Martín Ferreyra, INIMEC - CONICET,

Universidad Nacional de Córdoba, Córdoba, 5000, Argentina.

<sup>2</sup>Serviço de Microscopia Eletrônica, Centro de Pesquisas Gonçalo Moniz, Fiocruz-Ba, 40296-710, Brazil

Running Head: Giardicidal action of lactoferrin and its N-peptide

\*Corresponding author

Email: ctouz@immf.uncor.edu

**Supplementary Figure S1: GILRP and GIENThp are involved in the endocytosis of Bodipy-LDL.**

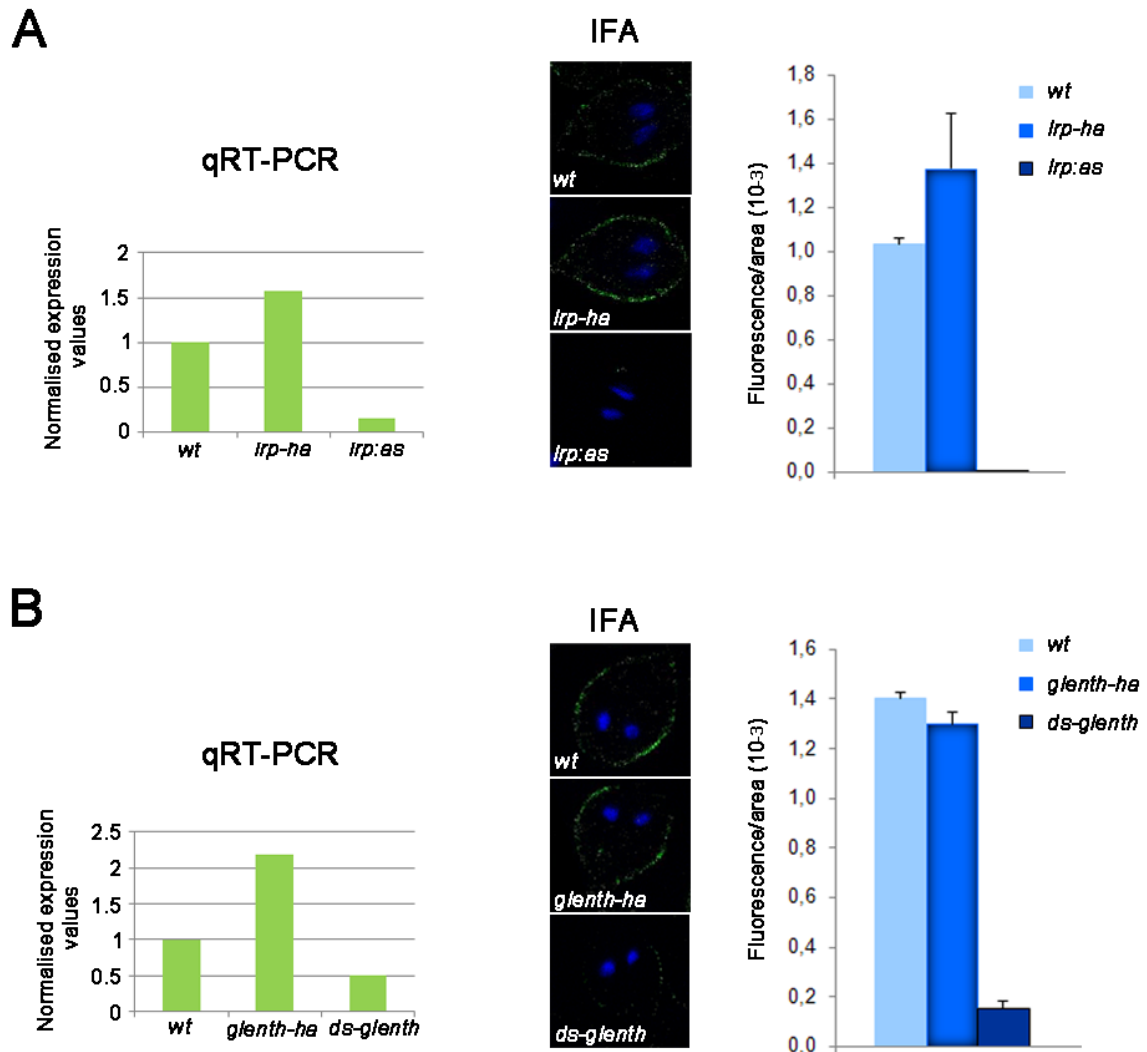

**GILRP and GIENThp are involved in the endocytosis of Bodipy-LDL.** (A) qRT-PCR: *lrp* gene expression in *wild-type* (wt), *lrp-ha*, and *lrp:as* trophozoites. Expression was normalized to the *gdh* housekeeping gene. Error bars indicate standard deviation for experiments with more than one trial. IFA: Confocal fluorescence microscopy of Bodipy-LDL endocytosis (up to 30 min) in *wild-type* (wt), *lrp-ha*, and *lrp:as* trophozoites. Nuclear DNA was labeled with DAPI (blue). Bars: Histograms of fluorescent images (fluorescence/area  $\times 10^3$ ) show the relative amount of fluorescent Bodipy-LDL internalized by parasites in control (*wild-type-wt*-) and transgenic cells (*lrp-ha* and *lrp:as*).

(B) qRT-PCR: *enth* gene expression in *wild-type* (wt), *glenth-ha*, and *ds-glenth* trophozoites. Expression was normalized to the *gdh* housekeeping gene. Error bars indicate standard deviation for experiments with more than one trial. IFA: Confocal fluorescence microscopy of Bodipy-LDL endocytosis (up to 30 min) in *wild-type* (wt), *glenth-ha*, and *ds-glenth* trophozoites. Nuclear DNA was labeled with DAPI (blue). Bars: Histograms of fluorescent images (fluorescence/area  $\times 10^3$ ) show the relative amount of fluorescent Bodipy-LDL internalized by parasites in control (*wild-type-wt*-) and transgenic cells (*glenth-ha* and *ds-glenth*).

Supplementary Figure S2: LRP-HA - bLF immunoprecipitation and immunoblotting.

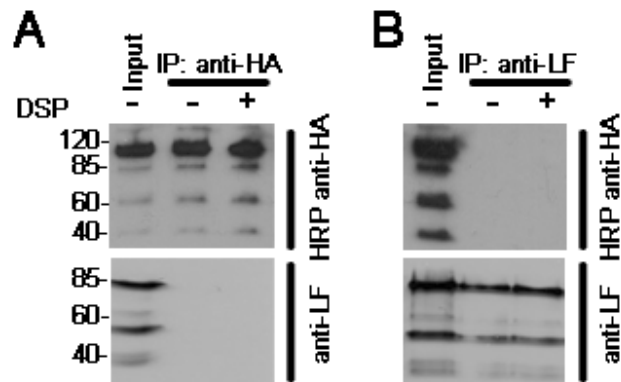

**LRP-HA - bLF immunoprecipitation (IPP) and immunoblotting:**

(A) Whole-cell extracts were isolated from *lrp-ha* trophozoites exposed to bLF for 30 min. Immunoprecipitations of LRP-HA were carried out using anti-HA mouse mAb (SIGMA) and immunoblotted using HRP-labelled anti-HA mouse mAb (SIGMA) to detect LRP-HA or rabbit anti-LF polyclonal antibody (Fab Gennix) to detect bLF. (B) A reverse immunoprecipitation assay was conducted from *lrp-ha* trophozoites exposed to bLF for 30 min using the rabbit anti-LF polyclonal antibody and immunoblotted using the rabbit anti-LF polyclonal antibody to detect bLF or the HRP-labelled anti-HA mouse mAb to detect LRP-HA. IPP was performed as described by Krtková et al. 2017, using the DSP cross-linker. All experiments were repeated three times with different sets of samples and nonspecific IgGs were used as a negative control for immunoprecipitation. Input: *lrp-ha* trophozoites extracts exposed to bLF for 30 min.

Krtkova, J. et al. 14-3-3 Regulates Actin Filament Formation in the Deep-Branching Eukaryote *Giardia lamblia*. *mSphere* 2, doi:10.1128/mSphere.00248-17 (2017).

**Figure S3. Full Western blot scans for Supplementary Fig. 2.**  
The full scans for each blot are shown on the bottom panels.

Each sample is explained in the Fig. S2 and denoted with the letters a to i.

**Fig S2**

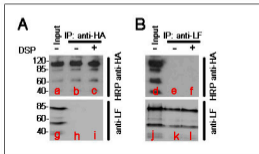

**Full WB scans**

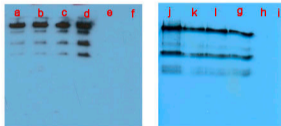

Supplement: 41598_2018_36563_MOESM1_ESM.pdf [file 41598_2018_36563_MOESM1_ESM.pdf]
